# Supplementary material for: Human gene and disease associations for clinical‐genomics and precision medicine research
Source: PubMed Central journal article supplement (PMC7240856; doi:10.1002/ctm2.28), 2020-05-03
Supplement: CTM2-10-297-s002.pdf [file CTM2-10-297-s002.pdf]

10:02

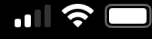

# PAS

Gene - Disease - Gene

Search

Gene => Disease

Total: 22

Gene: TNF

-Ensembl ID: ENSG00000232810

-Type: Protein Coding

-Disease: chlamydia

-Chromosome: chr6

-----

Gene: IL6

-Ensembl ID: ENSG00000136244

-Type: Protein Coding

-Disease: chlamydia

-Chromosome: chr7

-----

Gene: IL1B

-Ensembl ID: ENSG00000125538

-Type: Protein Coding

-Disease: chlamydia

zahmed@ifh.rutgers.edu

Menu

© Design and developed by Dr. Zeeshan Ahmed

---

10:03

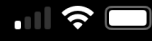

# PAS

Gene - Disease - Gene

Search

Gene => Disease

Total: 86

Gene: TNF  
-Ensembl ID: ENSG00000232810  
-Type: Protein Coding  
-Disease: haemophilus\_influenzae  
-Chromosome: chr6  
-----

Gene: TNF  
-Ensembl ID: ENSG00000232810  
-Type: Protein Coding  
-Disease: avian\_influenza  
-Chromosome: chr6  
-----

Gene: TNF  
-Ensembl ID: ENSG00000232810  
-Type: Protein Coding  
-Disease: swine\_influenza

[zahmed@ifh.rutgers.edu](mailto:zahmed@ifh.rutgers.edu)

Menu

© Design and developed by Dr. Zeeshan Ahmed

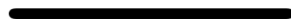

10:03



# PAS

Gene - Disease - Gene

Search

Gene => Disease

Total: 31

Gene: TNF

-Ensembl ID: ENSG00000232810

-Type: Protein Coding

-Disease: staphylococcal\_toxic\_shock\_syndrome

-Chromosome: chr6

-----

Gene: IL1B

-Ensembl ID: ENSG00000125538

-Type: Protein Coding

-Disease: staphylococcal\_toxic\_shock\_syndrome

-Chromosome: chr2

-----

Gene: IFNG

-Ensembl ID: ENSG00000111537

-Type: Protein Coding

-Disease: staphylococcal\_toxic\_shock\_syndrome

zahmed@ifh.rutgers.edu

Menu

© Design and developed by Dr. Zeeshan Ahmed

10:04

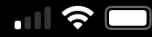

# PAS

Gene - Disease - Gene

Search

Gene => Disease

Total: 103

Gene: IL6

-Ensembl ID: ENSG00000136244

-Type: Protein Coding

-Disease: human\_herpesvirus\_8

-Chromosome: chr7

-----

Gene: APOE

-Ensembl ID: ENSG00000130203

-Type: Protein Coding

-Disease: herpes\_simplex\_encephalitis

-Chromosome: chr19

-----

Gene: APOE

-Ensembl ID: ENSG00000130203

-Type: Protein Coding

-Disease: genital herpes

[zahmed@ifh.rutgers.edu](mailto:zahmed@ifh.rutgers.edu)

Menu

© Design and developed by Dr. Zeeshan Ahmed

10:05



# PAS

Gene - Disease - Gene

shigellosis

Search

Gene => Disease

Total: 16

Gene: IL10

-Ensembl ID: ENSG00000136634

-Type: Protein Coding

-Disease: shigellosis

-Chromosome: chr1

-----

Gene: CXCL8

-Ensembl ID: ENSG00000169429

-Type: Protein Coding

-Disease: shigellosis

-Chromosome: chr4

-----

Gene: SRC

-Ensembl ID: ENSG00000197122

-Type: Protein Coding

-Disease: shigellosis

zahmed@ifh.rutgers.edu

Menu

© Design and developed by Dr. Zeeshan Ahmed



10:06



# PAS

Gene - Disease - Gene

Search

Gene => Disease

Total: 102

Gene: HLA-DRB1  
-Ensembl ID: ENSG00000196126  
-Type: Protein Coding  
-Disease: syphilis  
-Chromosome: chr6  
-----

Gene: BCL2  
-Ensembl ID: ENSG00000171791  
-Type: Protein Coding  
-Disease: syphilis  
-Chromosome: chr18  
-----

Gene: CXCL8  
-Ensembl ID: ENSG00000169429  
-Type: Protein Coding

[zahmed@ifh.rutgers.edu](mailto:zahmed@ifh.rutgers.edu)

Menu

© Design and developed by Dr. Zeeshan Ahmed

10:11

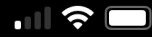

# PAS

Gene - Disease - Gene

Search

Gene => Disease

Total: 185

Gene: CCL2

-Ensembl ID: ENSG00000108691

-Type: Protein Coding

-Disease: pneumonia

-Chromosome: chr17

-----

Gene: CCL2

-Ensembl ID: ENSG00000108691

-Type: Protein Coding

-Disease: idiopathic\_interstitial\_pneumonia

-Chromosome: chr17

-----

Gene: CCL2

-Ensembl ID: ENSG00000108691

-Type: Protein Coding

-Disease: nonspecific\_interstitial\_pneumonia

[zahmed@ifh.rutgers.edu](mailto:zahmed@ifh.rutgers.edu)

Menu

© Design and developed by Dr. Zeeshan Ahmed

---

10:11



# PAS

Gene - Disease - Gene

Search

Gene => Disease

Total: 325

Gene: TNF  
-Ensembl ID: ENSG00000232810  
-Type: Protein Coding  
-Disease: hepatitis  
-Chromosome: chr6  
-----

Gene: TNF  
-Ensembl ID: ENSG00000232810  
-Type: Protein Coding  
-Disease: hepatitis\_a  
-Chromosome: chr6  
-----

Gene: TNF  
-Ensembl ID: ENSG00000232810  
-Type: Protein Coding  
-Disease: hepatitis\_c

[zahmed@ifh.rutgers.edu](mailto:zahmed@ifh.rutgers.edu)

Menu

© Design and developed by Dr. Zeeshan Ahmed





10:13



# PAS

Gene - Disease - Gene

Search

Gene => Disease

Total: 20

Gene: CXCL8  
-Ensembl ID: ENSG00000169429  
-Type: Protein Coding  
-Disease: common\_cold  
-Chromosome: chr4  
-----

Gene: LDLR  
-Ensembl ID: ENSG00000130164  
-Type: Protein Coding  
-Disease: common\_cold  
-Chromosome: chr19  
-----

Gene: IL13  
-Ensembl ID: ENSG00000169194  
-Type: Protein Coding  
-Disease: common\_cold

[zahmed@ifh.rutgers.edu](mailto:zahmed@ifh.rutgers.edu)

Menu

© Design and developed by Dr. Zeeshan Ahmed

10:17

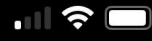

# PAS

Gene - Disease - Gene

salmonellosis

Search

Gene => Disease

Total: 17

-Disease: salmonellosis  
-Chromosome: chr1  
-----

Gene: TLR4  
-Ensembl ID: ENSG00000136869  
-Type: Protein Coding  
-Disease: salmonellosis  
-Chromosome: chr9  
-----

Gene: STAT1  
-Ensembl ID: ENSG00000115415  
-Type: Protein Coding  
-Disease: salmonellosis  
-Chromosome: chr2  
-----

zahmed@ifh.rutgers.edu

Menu

© Design and developed by Dr. Zeeshan Ahmed
