# Supplementary material for: Human gene and disease associations for clinical‐genomics and precision medicine research
Source: PubMed Central journal article supplement (PMC7240856; doi:10.1002/ctm2.28), 2020-05-03
Supplement: CTM2-10-297-s003.pdf [file CTM2-10-297-s003.pdf]

10:41

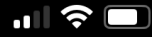

# PAS

## SNPs

Search

SNP => Description

Total: 2174

Reported Gene: KCNQ1

-SNP: rs163182

-Chromosome: 11

-Context: intron\_variant

-Disease: Type 2 diabetes

-Study: A genome-wide association study confirms previously reported loci for type 2 diabetes in Han Chinese.

-----

Reported Gene: C2CD4B, C2CD4A

-SNP: rs1436953

-Chromosome: 15

-Context: intergenic\_variant

-Disease: Type 2 diabetes

-Study: A genome-wide association study confirms previously reported loci for type 2 diabetes in Han Chinese.

-----

[zahmed@ifh.rutgers.edu](mailto:zahmed@ifh.rutgers.edu)

Menu

© Design and developed by Dr. Zeeshan Ahmed

10:41

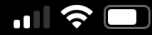

# PAS

## SNPs

Search

SNP => Description

Total: 2583

Reported Gene: HLA-B

-SNP: rs2524054

-Chromosome: 6

-Context: intron\_variant

-Disease: CD4:CD8 lymphocyte ratio

-Study: Quantitative trait loci for CD4:CD8 lymphocyte ratio are associated with risk of type 1 diabetes and HIV-1 immune control.

-----

Reported Gene: HLA-B

-SNP: rs2524054

-Chromosome: 6

-Context: intron\_variant

-Disease: CD4:CD8 lymphocyte ratio

-Study: Quantitative trait loci for CD4:CD8 lymphocyte ratio are associated with risk of type 1 diabetes and HIV-1 immune control.

-----

[zahmed@ifh.rutgers.edu](mailto:zahmed@ifh.rutgers.edu)

Menu

© Design and developed by Dr. Zeeshan Ahmed

10:42

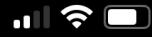

# PAS

## SNPs

schizophrenia

Search

SNP => Description

Total: 2286

Reported Gene: LOC100128714

-SNP: rs4906844

-Chromosome: 15

-Context: intron\_variant

-Disease: Cortical thickness

-Study: Association of genetic variants on 15q12 with cortical thickness and cognition in schizophrenia.

-----

Reported Gene: NR

-SNP: rs16915157

-Chromosome: 10

-Context: intron\_variant

-Disease: Schizophrenia

-Study: Genome-wide association study identifies five new schizophrenia loci.

-----

[zahmed@ifh.rutgers.edu](mailto:zahmed@ifh.rutgers.edu)

Menu

© Design and developed by Dr. Zeeshan Ahmed

10:42

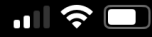

# PAS

## SNPs

hla-drb1

Search

SNP => Description

Total: 216

Reported Gene: HLA-DRB1, HLA-DQA1  
-SNP: rs3129763  
-Chromosome: 6  
-Context: regulatory\_region\_variant  
-Disease: Systemic sclerosis  
-Study: Identification of novel genetic markers associated with clinical phenotypes of systemic sclerosis through a genome-wide association strategy.

-----  
Reported Gene: HLA-DRB1  
-SNP: rs9271366  
-Chromosome: 6  
-Context: intergenic\_variant  
-Disease: Immunoglobulin A  
-Study: Association of IFIH1 and other autoimmunity risk alleles with selective IgA deficiency

[zahmed@ifh.rutgers.edu](mailto:zahmed@ifh.rutgers.edu)

Menu

© Design and developed by Dr. Zeeshan Ahmed

10:43

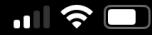

# PAS

## SNPs

tnfrsf1a

Search

SNP => Description

Total: 35

Reported Gene: HLA-DRB1  
-SNP: rs3135388  
-Chromosome: 6  
-Context: intergenic\_variant  
-Disease: Multiple sclerosis  
-Study: Meta-analysis of genome scans and replication identify CD6, IRF8 and TNFRSF1A as new multiple sclerosis susceptibility loci.  
-----

Reported Gene: HLA-B  
-SNP: rs2523393  
-Chromosome: 6  
-Context: non\_coding\_transcript\_exon\_variant  
-Disease: Multiple sclerosis  
-Study: Meta-analysis of genome scans and replication identify CD6, IRF8 and TNFRSF1A as new multiple sclerosis susceptibility loci.  
-----

[zahmed@ifh.rutgers.edu](mailto:zahmed@ifh.rutgers.edu)

Menu

© Design and developed by Dr. Zeeshan Ahmed

10:43



# PAS

## SNPs

Search

SNP => Description

Total: 44

Reported Gene: PTPN22  
-SNP: rs2476601  
-Chromosome: 1  
-Context: missense\_variant  
-Disease: Crohns disease  
-Study: Genome-wide association defines more than 30 distinct susceptibility loci for Crohns disease.

-----

Reported Gene: PTPN22  
-SNP: rs2476601  
-Chromosome: 1  
-Context: missense\_variant  
-Disease: Type 1 diabetes  
-Study: A genome-wide association study identifies KIAA0350 as a type 1 diabetes gene.

-----

[zahmed@ifh.rutgers.edu](mailto:zahmed@ifh.rutgers.edu)

Menu

© Design and developed by Dr. Zeeshan Ahmed

10:44



# PAS

## SNPs

Search

SNP => Description

Total: 142

Reported Gene: HNF1A

-SNP: rs2393791

-Chromosome: 12

-Context: intron\_variant

-Disease: Gamma glutamyl transpeptidase

-Study: Large-scale genome-wide association studies in East Asians identify new genetic loci influencing metabolic traits.

-----

Reported Gene: C12orf27, HNF1A

-SNP: rs7310409

-Chromosome: 12

-Context: intron\_variant

-Disease: Liver enzyme levels (gamma-glutamyl transferase)

-Study: Genome-wide association study identifies loci influencing concentrations of liver enzymes in plasma

[zahmed@ifh.rutgers.edu](mailto:zahmed@ifh.rutgers.edu)

Menu

© Design and developed by Dr. Zeeshan Ahmed

10:44



# PAS

## SNPs

hnf4a

Search

SNP => Description

Total: 46

Reported Gene: HNF4A  
-SNP: rs4812829  
-Chromosome: 20  
-Context: intron\_variant  
-Disease: Type 2 diabetes  
-Study: Genome-wide association study in individuals of South Asian ancestry identifies six new type 2 diabetes susceptibility loci.  
-----

Reported Gene: HNF4A  
-SNP: rs1800961  
-Chromosome: 20  
-Context: missense\_variant  
-Disease: HDL cholesterol  
-Study: Biological, clinical and population relevance of 95 loci for blood lipids.  
-----

[zahmed@ifh.rutgers.edu](mailto:zahmed@ifh.rutgers.edu)

Menu

© Design and developed by Dr. Zeeshan Ahmed



10:44



# PAS

## SNPs

Search

SNP => Description

Total: 2

Reported Gene: ARF5, PAX4, SND1  
-SNP: rs10229583  
-Chromosome: 7  
-Context: intergenic\_variant  
-Disease: Type 2 diabetes  
-Study: Genome-wide association study in a Chinese population identifies a susceptibility locus for type 2 diabetes at 7q32 near PAX4.

-----

Reported Gene: NR  
-SNP: rs17716738  
-Chromosome: 7  
-Context: regulatory\_region\_variant  
-Disease: Reaction time  
-Study: Study of 300,486 individuals identifies 148 independent genetic loci influencing general cognitive function.

-----

[zahmed@ifh.rutgers.edu](mailto:zahmed@ifh.rutgers.edu)

Menu

© Design and developed by Dr. Zeeshan Ahmed

10:44



# PAS

## SNPs

Search

SNP => Description

Total: 10

Reported Gene: DRD2

-SNP: rs11214606

-Chromosome: 11

-Context: intron\_variant

-Disease: Response to antipsychotic treatment in schizophrenia (working memory)

-Study: Genome-wide pharmacogenomic study of neurocognition as an indicator of antipsychotic treatment response in schizophrenia.

-----

Reported Gene: DRD2

-SNP: rs1079596

-Chromosome: 11

-Context: intron\_variant

-Disease: Select biomarker traits

-Study: Genome-wide association with select biomarker traits in the Framingham Heart Study.

-----

[zahmed@ifh.rutgers.edu](mailto:zahmed@ifh.rutgers.edu)

Menu

© Design and developed by Dr. Zeeshan Ahmed

10:45

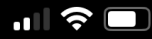

# PAS

## SNPs

cacnb2

Search

SNP => Description

Total: 45

Reported Gene: CACNB2

-SNP: rs12258967

-Chromosome: 10

-Context: intron\_variant

-Disease: Blood pressure

-Study: Genome-wide association study identifies six new loci influencing pulse pressure and mean arterial pressure.

-----

Reported Gene: CACNB2

-SNP: rs4373814

-Chromosome: 10

-Context: intergenic\_variant

-Disease: Systolic blood pressure

-Study: Genetic variants in novel pathways influence blood pressure and cardiovascular disease risk.

-----

[zahmed@ifh.rutgers.edu](mailto:zahmed@ifh.rutgers.edu)

Menu

© Design and developed by Dr. Zeeshan Ahmed

10:45



# PAS

## SNPs

Search

SNP => Description

Total: 16

Reported Gene: NR  
-SNP: rs2189812  
-Chromosome: 7  
-Context: intron\_variant  
-Disease: IgG glycosylation  
-Study: Loci associated with N-glycosylation of human immunoglobulin G show pleiotropy with autoimmune diseases and haematological cancers.

-----

Reported Gene: NR  
-SNP: rs10952890  
-Chromosome: 7  
-Context: intron\_variant  
-Disease: Gestational age at birth in labor-initiated deliveries (child effect)  
-Study: Literature-Informed Analysis of a Genome-Wide Association Study of Gestational Age in Norwegian Women and Children Suggests

[zahmed@ifh.rutgers.edu](mailto:zahmed@ifh.rutgers.edu)

Menu

© Design and developed by Dr. Zeeshan Ahmed
