# Supplementary material for: Human gene and disease associations for clinical‐genomics and precision medicine research
Source: PubMed Central journal article supplement (PMC7240856; doi:10.1002/ctm2.28), 2020-05-03
Supplement: CTM2-10-297-s004.pdf [file CTM2-10-297-s004.pdf]

10:51

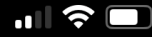

# PAS

## Somatic SNPs

esr1

Search

SNP => Description

Total: 216

Reported Gene: ESR1\_ENST00000544394  
-Accession Number: ENST00000544394  
-ID tumour: 2577643  
-let\_Gene CDS length: 933  
-HGNC ID: NA  
-let\_Sample\_name: P-0002562-T01-IM3  
-ID sample: 2718822  
-Primary site: breast  
-Mutation AA: p.E207Q  
-Mutation Description: Substitution - Missense  
-Mutation CDS: c.619G>C  
-GRCh: 38  
-Mutation genome position:  
6:152011697-152011697  
-FATHMM prediction: PATHOGENIC  
-FATHMM score: 0.99994  
-Mutation somatic status: Confirmed somatic  
variant  
-Sample Type: fixed - NOS  
-Tumour origin: metastasis

[zahmed@ifh.rutgers.edu](mailto:zahmed@ifh.rutgers.edu)

Menu

© Design and developed by Dr. Zeeshan Ahmed

10:52

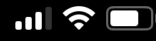

# PAS

## Somatic SNPs

Search

SNP => Description

Total: 178

Reported Gene: AKT1  
-Accession Number: ENST00000349310  
-ID tumour: 2527787  
-let\_Gene CDS length: 1443  
-HGNC ID: 391  
-let\_Sample\_name: BC80-tumour  
-ID sample: 2668208  
-Primary site: breast  
-Mutation AA: p.E17K  
-Mutation Description: Substitution - Missense  
-Mutation CDS: c.49G>A  
-GRCh: 38  
-Mutation genome position:  
14:104780214-104780214  
-FATHMM prediction: PATHOGENIC  
-FATHMM score: 0.99513  
-Mutation somatic status: Confirmed somatic  
variant  
-Sample Type: surgery fresh/frozen  
-Tumour origin: metastasis

[zahmed@ifh.rutgers.edu](mailto:zahmed@ifh.rutgers.edu)

Menu

© Design and developed by Dr. Zeeshan Ahmed

10:52

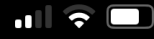

# PAS

## Somatic SNPs

erbb2

Search

SNP => Description

Total: 600

Reported Gene: ERBB2IP\_ENST00000380943  
-Accession Number: ENST00000380943  
-ID tumour: 2128605  
-let\_Gene CDS length: 4116  
-HGNC ID: NA  
-let\_Sample\_name: S02330  
-ID sample: 2261620  
-Primary site: lung  
-Mutation AA: p.D604Y  
-Mutation Description: Substitution - Missense  
-Mutation CDS: c.1810G>T  
-GRCh: 38  
-Mutation genome position:  
5:66048688-66048688  
-FATHMM prediction: PATHOGENIC  
-FATHMM score: 0.99397  
-Mutation somatic status: Confirmed somatic  
variant  
-Sample Type: surgery fresh/frozen  
-Tumour origin: NS

[zahmed@ifh.rutgers.edu](mailto:zahmed@ifh.rutgers.edu)

Menu

© Design and developed by Dr. Zeeshan Ahmed

10:52

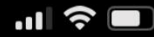

# PAS

## Somatic SNPs

brca1

Search

SNP => Description

Total: 344

Reported Gene: BRCA1\_ENST00000471181  
-Accession Number: ENST00000471181  
-ID tumour: 1896324  
-let\_Gene CDS length: 5655  
-HGNC ID: 1100  
-let\_Sample\_name: YUSWI  
-ID sample: 2013692  
-Primary site: skin  
-Mutation AA: p.P1020L  
-Mutation Description: Substitution - Missense  
-Mutation CDS: c.3059C>T  
-GRCh: 38  
-Mutation genome position:  
17:43092472-43092472  
-FATHMM prediction: NEUTRAL  
-FATHMM score: 0.0789  
-Mutation somatic status: Confirmed somatic  
variant  
-Sample Type: NS  
-Tumour origin: NS

zahmed@ifh.rutgers.edu

Menu

© Design and developed by Dr. Zeeshan Ahmed

10:53

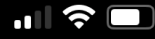

# PAS

## Somatic SNPs

brca2

Search

SNP => Description

Total: 574

Reported Gene: BRCA2  
-Accession Number: ENST00000380152  
-ID tumour: 2583835  
-let\_Gene CDS length: 10257  
-HGNC ID: 1101  
-let\_Sample\_name: P-0009012-T01-IM5  
-ID sample: 2725014  
-Primary site: large\_intestine  
-Mutation AA: p.?  
-Mutation Description: Unknown  
-Mutation CDS: c.67+1G>T  
-GRCh: 38  
-Mutation genome position:  
13:32316528-32316528  
-FATHMM prediction: PATHOGENIC  
-FATHMM score: 0.89926  
-Mutation somatic status: Confirmed somatic  
variant  
-Sample Type: surgery-fixed  
-Tumour origin: primary

[zahmed@ifh.rutgers.edu](mailto:zahmed@ifh.rutgers.edu)

Menu

© Design and developed by Dr. Zeeshan Ahmed

10:53

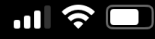

# PAS

## Somatic SNPs

rbm10

Search

SNP => Description

Total: 125

Reported Gene: RBM10  
-Accession Number: ENST00000377604  
-ID tumour: 2583201  
-let\_Gene CDS length: 2793  
-HGNC ID: 9896  
-let\_Sample\_name: P-0008234-T01-IM5  
-ID sample: 2724380  
-Primary site: urinary\_tract  
-Mutation AA: p.S43\*  
-Mutation Description: Substitution - Nonsense  
-Mutation CDS: c.128C>G  
-GRCh: 38  
-Mutation genome position:  
23:47169425-47169425  
-FATHMM prediction: PATHOGENIC  
-FATHMM score: 0.91231  
-Mutation somatic status: Confirmed somatic  
variant  
-Sample Type: surgery-fixed  
-Tumour origin: primary

zahmed@ifh.rutgers.edu

Menu

© Design and developed by Dr. Zeeshan Ahmed

10:53

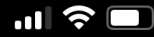

# PAS

## Somatic SNPs

ptpn13

Search

SNP => Description

Total: 110

Reported Gene: PTPN13  
-Accession Number: ENST00000436978  
-ID tumour: 1994471  
-let\_Gene CDS length: 7473  
-HGNC ID: 9646  
-let\_Sample\_name: SS6003312  
-ID sample: 2120235  
-Primary site: oesophagus  
-Mutation AA: p.E1090\*  
-Mutation Description: Substitution - Nonsense  
-Mutation CDS: c.3268G>T  
-GRCh: 38  
-Mutation genome position:  
4:86758304-86758304  
-FATHMM prediction: PATHOGENIC  
-FATHMM score: 0.99341  
-Mutation somatic status: Confirmed somatic  
variant  
-Sample Type: NS  
-Tumour origin: NS

[zahmed@ifh.rutgers.edu](mailto:zahmed@ifh.rutgers.edu)

Menu

© Design and developed by Dr. Zeeshan Ahmed

10:53

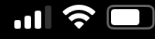

# PAS

## Somatic SNPs

Search

SNP => Description

Total: 71

Reported Gene: PPP6C\_ENST00000451402  
-Accession Number: ENST00000451402  
-ID tumour: 2066414  
-let\_Gene CDS length: 1029  
-HGNC ID: 9323  
-let\_Sample\_name: TCGA-BR-8591-01  
-ID sample: 2198136  
-Primary site: stomach  
-Mutation AA: p.T338T  
-Mutation Description: Substitution - coding silent  
-Mutation CDS: c.1014G>A  
-GRCh: 38  
-Mutation genome position:  
9:125149688-125149688  
-FATHMM prediction: NA  
-FATHMM score: 0.64415  
-Mutation somatic status: Confirmed somatic  
variant  
-Sample Type: NS  
-Tumour origin: NS

[zahmed@ifh.rutgers.edu](mailto:zahmed@ifh.rutgers.edu)

Menu

© Design and developed by Dr. Zeeshan Ahmed



10:45

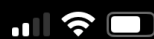

# PAS

## Somatic SNPs

esr1

Search

SNP => Description

Total: 216

Reported Gene: ESR1\_ENST00000544394

-Primary site: breast

-Primary histology: carcinoma

-Histology subtype: ductal\_carcinoma

-Mutation Description: Substitution - Missense

-Mutation genome position:

6:152011697-152011697

-Accession Number: ENST00000544394

-----

Reported Gene: ESR1

-Primary site: large\_intestine

-Primary histology: carcinoma

-Histology subtype: adenocarcinoma

-Mutation Description: Substitution - coding silent

-Mutation genome position:

6:151808173-151808173

-Accession Number: ENST00000440973

-----

zahmed@ifh.rutgers.edu

Menu

10:46

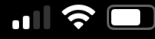

# PAS

## Somatic SNPs

akt1

Search

SNP => Description

Total: 178

Reported Gene: AKT1  
-Primary site: breast  
-Primary histology: carcinoma  
-Histology subtype: NS  
-Mutation Description: Substitution - Missense  
-Mutation genome position:  
14:104780214-104780214  
-Accession Number: ENST00000349310  
-----

Reported Gene: AKT1  
-Primary site: bone  
-Primary histology: Overgrowth\_syndrome  
-Histology subtype: Proteus\_syndrome  
-Mutation Description: Substitution - Missense  
-Mutation genome position:  
14:104780214-104780214  
-Accession Number: ENST00000349310  
-----

[zahmed@ifh.rutgers.edu](mailto:zahmed@ifh.rutgers.edu)

Menu
