# Supplementary material for: Human gene and disease associations for clinical‐genomics and precision medicine research
Source: PubMed Central journal article supplement (PMC7240856; doi:10.1002/ctm2.28), 2020-05-03
Supplement: CTM2-10-297-s005.pdf [file CTM2-10-297-s005.pdf]

10:20

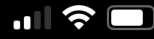

# PAS

## International Classification of Diseases (ICD)

Search

(ICD) Number => Description

Total: 577

(ICD10) E0800 => Diabetes mellitus due to underlying condition with hyperosmolarity without nonketotic hyperglycemic-hyperosmolar coma (NKHHC)

(ICD10) E0801 => Diabetes mellitus due to underlying condition with hyperosmolarity with coma

(ICD10) E0810 => Diabetes mellitus due to underlying condition with ketoacidosis without coma

(ICD10) E0811 => Diabetes mellitus due to underlying condition with ketoacidosis with coma

(ICD10) E0821 => Diabetes mellitus due to underlying condition with diabetic nephropathy

(ICD10) E0822 => Diabetes mellitus due to

[zahmed@ifh.rutgers.edu](mailto:zahmed@ifh.rutgers.edu)

Menu

© Design and developed by Dr. Zeeshan Ahmed

10:21

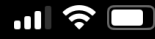

# PAS

ICD9

diabetes

Search

(ICD) Number => Description

Total: 69

(ICD9) 24900 => Secondary diabetes mellitus without mention of complication, not stated as uncontrolled, or unspecified

(ICD9) 24901 => Secondary diabetes mellitus without mention of complication, uncontrolled

(ICD9) 24910 => Secondary diabetes mellitus with ketoacidosis, not stated as uncontrolled, or unspecified

(ICD9) 24911 => Secondary diabetes mellitus with ketoacidosis, uncontrolled

(ICD9) 24920 => Secondary diabetes mellitus with hyperosmolarity, not stated as uncontrolled, or unspecified

(ICD9) 24921 => Secondary diabetes mellitus with hyperosmolarity, uncontrolled

[zahmed@ifh.rutgers.edu](mailto:zahmed@ifh.rutgers.edu)

Menu

© Design and developed by Dr. Zeeshan Ahmed

10:21

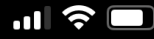

# PAS

ICD10

Search

(ICD) Number => Description

Total: 508

(ICD10) E0800 => Diabetes mellitus due to underlying condition with hyperosmolarity without nonketotic hyperglycemic-hyperosmolar coma (NKHHC)

(ICD10) E0801 => Diabetes mellitus due to underlying condition with hyperosmolarity with coma

(ICD10) E0810 => Diabetes mellitus due to underlying condition with ketoacidosis without coma

(ICD10) E0811 => Diabetes mellitus due to underlying condition with ketoacidosis with coma

(ICD10) E0821 => Diabetes mellitus due to underlying condition with diabetic nephropathy

(ICD10) E0822 => Diabetes mellitus due to

[zahmed@ifh.rutgers.edu](mailto:zahmed@ifh.rutgers.edu)

Menu

© Design and developed by Dr. Zeeshan Ahmed

10:22

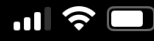

# PAS

## National Drug Codes (NDC)

diabetes

Search

NDC => Description

Total: 6

NDC: 0372-0043  
-TYPE: HUMAN OTC DRUG  
-PROPRIETARY NAME: Scot-Tussin Diabetes  
Cough Formula with DM  
-NON PROPRIETARY NAME: dextromethorphan  
hydrobromide  
-DOSAGE FORM NAME: LIQUID  
-ROUTE NAME: ORAL  
-MARKETING CATEGORY NAME: OTC  
MONOGRAPH FINAL  
-APPLICATION NUMBER: part341  
-LABELER NAME: SCOT-TUSSIN Pharmacal Co.,  
Inc.  
-SUBSTANCE NAME: DEXTROMETHORPHAN  
HYDROBROMIDE  
-ACTIVE NUMERATOR STRENGTH: 10  
-ACTIVE INGRED UNIT: mg/5mL  
-PHARM CLASSES: NA  
-LISTING RECORD CERTIFIED THROUGH:  
20181231

[zahmed@ifh.rutgers.edu](mailto:zahmed@ifh.rutgers.edu)

Menu

© Design and developed by Dr. Zeeshan Ahmed

10:22

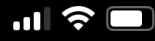

# PAS

## International Classification of Diseases (ICD)

Search

(ICD) Number => Description

Total: 44

(ICD10) A413 => Sepsis due to Hemophilus influenzae

(ICD10) A492 => Hemophilus influenzae infection, unspecified site

(ICD10) B963 => Hemophilus influenzae [H. influenzae] as the cause of diseases classified elsewhere

(ICD10) J09X1 => Influenza due to identified novel influenza A virus with pneumonia

(ICD10) J09X2 => Influenza due to identified novel influenza A virus with other respiratory manifestations

(ICD10) J09X3 => Influenza due to identified novel influenza A virus with gastrointestinal manifestations

[zahmed@ifh.rutgers.edu](mailto:zahmed@ifh.rutgers.edu)

Menu

© Design and developed by Dr. Zeeshan Ahmed

10:22



# PAS

ICD9

Search

(ICD) Number => Description

Total: 16

(ICD9) 03841 => Septicemia due to hemophilus influenzae [H. influenzae]

(ICD9) 0415 => Hemophilus influenzae [H. influenzae] infection in conditions classified elsewhere and of unspecified site

(ICD9) 4802 => Pneumonia due to parainfluenza virus

(ICD9) 4822 => Pneumonia due to Hemophilus influenzae [H. influenzae]

(ICD9) 4870 => Influenza with pneumonia

(ICD9) 4871 => Influenza with other respiratory manifestations

(ICD9) 4878 => Influenza with other manifestations

[zahmed@ifh.rutgers.edu](mailto:zahmed@ifh.rutgers.edu)

Menu

© Design and developed by Dr. Zeeshan Ahmed

10:23

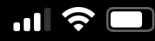

# PAS

ICD10

Search

(ICD) Number => Description

Total: 28

(ICD10) A413 => Sepsis due to Hemophilus influenzae

(ICD10) A492 => Hemophilus influenzae infection, unspecified site

(ICD10) B963 => Hemophilus influenzae [H. influenzae] as the cause of diseases classified elsewhere

(ICD10) J09X1 => Influenza due to identified novel influenza A virus with pneumonia

(ICD10) J09X2 => Influenza due to identified novel influenza A virus with other respiratory manifestations

(ICD10) J09X3 => Influenza due to identified novel influenza A virus with gastrointestinal manifestations

[zahmed@ifh.rutgers.edu](mailto:zahmed@ifh.rutgers.edu)

Menu

10:23

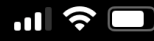

# PAS

## National Drug Codes (NDC)

Search

NDC => Description

Total: 14

NDC: 43742-0235  
-TYPE: HUMAN OTC DRUG  
-PROPRIETARY NAME: Influenza Grippe Nosode  
-NON PROPRIETARY NAME: Influenzinum 2012,  
Respiratory Syncytial Virus  
-DOSAGE FORM NAME: LIQUID  
-ROUTE NAME: ORAL  
-MARKETING CATEGORY NAME: UNAPPROVED  
HOMEOPATHIC  
-APPLICATION NUMBER: NA  
-LABELER NAME: Deseret Biologicals, Inc.  
-SUBSTANCE NAME: INFLUENZA A VIRUS A/  
CALIFORNIA/7/2009 X-179A (H1N1) ANTIGEN  
(FORMALDEHYDE INACTIVATED); INFLUENZA A  
VIRUS A/PERTH/16/2009 (H3N2) LIVE  
(ATTENUATED) ANTIGEN; INFLUENZA B VIRUS B/  
BRISBANE/60/2008 ANTIGEN (FORMALDEHYDE  
INACTIVATED); RESPIRATORY SYNCYTIAL VIRUS  
IMMUNE GLOBULIN INTRAVENOUS (HUMAN)  
-ACTIVE INGREDIENT STRENGTH: 0.0002

[zahmed@ifh.rutgers.edu](mailto:zahmed@ifh.rutgers.edu)

Menu



10:23

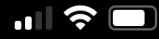

# PAS

## International Classification of Diseases (ICD)

Search

(ICD) Number => Description

Total: 110

(ICD10) A0100 => Typhoid fever, unspecified

(ICD10) A0102 => Typhoid fever with heart involvement

(ICD10) A0109 => Typhoid fever with other complications

(ICD10) A011 => Paratyphoid fever A

(ICD10) A012 => Paratyphoid fever B

(ICD10) A013 => Paratyphoid fever C

(ICD10) A014 => Paratyphoid fever, unspecified

(ICD10) A259 => Rat-bite fever, unspecified

(ICD10) A380 => Scarlet fever with otitis media

[zahmed@ifh.rutgers.edu](mailto:zahmed@ifh.rutgers.edu)

Menu

10:23

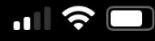

# PAS

ICD9

Search

(ICD) Number => Description

Total: 48

(ICD9) 0020 => Typhoid fever  
(ICD9) 0021 => Paratyphoid fever A  
(ICD9) 0022 => Paratyphoid fever B  
(ICD9) 0023 => Paratyphoid fever C  
(ICD9) 0029 => Paratyphoid fever, unspecified  
(ICD9) 0260 => Spirillary fever  
(ICD9) 0261 => Streptobacillary fever  
(ICD9) 0269 => Unspecified rat-bite fever  
(ICD9) 0341 => Scarlet fever  
(ICD9) 0600 => Sylvatic yellow fever

[zahmed@ifh.rutgers.edu](mailto:zahmed@ifh.rutgers.edu)

Menu

© Design and developed by Dr. Zeeshan Ahmed

10:24

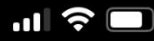

# PAS

ICD10

Search

(ICD) Number => Description

Total: 62

(ICD10) A0100 => Typhoid fever, unspecified

(ICD10) A0102 => Typhoid fever with heart involvement

(ICD10) A0109 => Typhoid fever with other complications

(ICD10) A011 => Paratyphoid fever A

(ICD10) A012 => Paratyphoid fever B

(ICD10) A013 => Paratyphoid fever C

(ICD10) A014 => Paratyphoid fever, unspecified

(ICD10) A259 => Rat-bite fever, unspecified

(ICD10) A380 => Scarlet fever with otitis media

[zahmed@ifh.rutgers.edu](mailto:zahmed@ifh.rutgers.edu)

Menu

© Design and developed by Dr. Zeeshan Ahmed

10:24

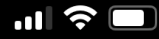

# PAS

## National Drug Codes (NDC)

Search

NDC => Description

Total: 284

NDC: 0113-0020  
-TYPE: HUMAN OTC DRUG  
-PROPRIETARY NAME: good sense childrens pain  
and fever  
-NON PROPRIETARY NAME: Acetaminophen  
-DOSAGE FORM NAME: SUSPENSION  
-ROUTE NAME: ORAL  
-MARKETING CATEGORY NAME: OTC  
MONOGRAPH NOT FINAL  
-APPLICATION NUMBER: part343  
-LABELER NAME: L. Perrigo Company  
-SUBSTANCE NAME: ACETAMINOPHEN  
-ACTIVE NUMERATOR STRENGTH: 160  
-ACTIVE INGRED UNIT: mg/5mL  
-PHARM CLASSES: NA  
-LISTING RECORD CERTIFIED THROUGH:  
20191231  
-PRODUCT ID: 0113-0020\_fe2d2ffa-  
f511-4451-8911-4e1102c25ccc

---

[zahmed@ifh.rutgers.edu](mailto:zahmed@ifh.rutgers.edu)

Menu

10:25

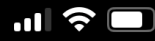

# PAS

## International Classification of Diseases (ICD)

Search

(ICD) Number => Description

Total: 18

(ICD10) Y620 => Failure of sterile precautions during surgical operation

(ICD10) Y621 => Failure of sterile precautions during infusion or transfusion

(ICD10) Y622 => Failure of sterile precautions during kidney dialysis and other perfusion

(ICD10) Y623 => Failure of sterile precautions during injection or immunization

(ICD10) Y624 => Failure of sterile precautions during endoscopic examination

(ICD10) Y625 => Failure of sterile precautions during heart catheterization

(ICD10) Y626 => Failure of sterile precautions during aspiration, puncture and other

[zahmed@ifh.rutgers.edu](mailto:zahmed@ifh.rutgers.edu)

Menu

© Design and developed by Dr. Zeeshan Ahmed

10:26

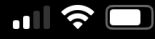

# PAS

ICD9

Search

(ICD) Number => Description

Total: 9

(ICD9) E8720 => Failure of sterile precautions during surgical operation

(ICD9) E8721 => Failure of sterile precautions during infusion or transfusion

(ICD9) E8722 => Failure of sterile precautions during kidney dialysis and other perfusion

(ICD9) E8723 => Failure of sterile precautions during injection or vaccination

(ICD9) E8724 => Failure of sterile precautions during endoscopic examination

(ICD9) E8725 => Failure of sterile precautions during aspiration of fluid or tissue, puncture, and catheterization

(ICD9) E8726 => Failure of sterile precautions

[zahmed@ifh.rutgers.edu](mailto:zahmed@ifh.rutgers.edu)

Menu

10:26

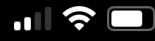

# PAS

ICD10

Search

(ICD) Number => Description

Total: 9

(ICD10) Y620 => Failure of sterile precautions during surgical operation

(ICD10) Y621 => Failure of sterile precautions during infusion or transfusion

(ICD10) Y622 => Failure of sterile precautions during kidney dialysis and other perfusion

(ICD10) Y623 => Failure of sterile precautions during injection or immunization

(ICD10) Y624 => Failure of sterile precautions during endoscopic examination

(ICD10) Y625 => Failure of sterile precautions during heart catheterization

(ICD10) Y626 => Failure of sterile precautions during aspiration, puncture and other

[zahmed@ifh.rutgers.edu](mailto:zahmed@ifh.rutgers.edu)

Menu

© Design and developed by Dr. Zeeshan Ahmed

10:26

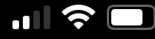

# PAS

## National Drug Codes (NDC)

sterile

Search

NDC => Description

Total: 138

NDC: 0002-0800  
-TYPE: HUMAN OTC DRUG  
-PROPRIETARY NAME: Sterile Diluent  
-NON PROPRIETARY NAME: diluent  
-DOSAGE FORM NAME: INJECTION, SOLUTION  
-ROUTE NAME: SUBCUTANEOUS  
-MARKETING CATEGORY NAME: NDA  
-APPLICATION NUMBER: NDA018781  
-LABELER NAME: Eli Lilly and Company  
-SUBSTANCE NAME: WATER  
-ACTIVE NUMERATOR STRENGTH: 1  
-ACTIVE INGRED UNIT: mL/mL  
-PHARM CLASSES: NA  
-LISTING RECORD CERTIFIED THROUGH:  
20191231  
-PRODUCT ID:  
0002-0800\_4bb5d1cb-0fa7-48c7-9f6d-8d45f9b9  
1649  
-----

[zahmed@ifh.rutgers.edu](mailto:zahmed@ifh.rutgers.edu)

Menu
